# Supplementary material for: TonEBP: A Key Transcription Factor in Microglia Following Intracerebral Hemorrhage Induced-Neuroinflammation
Source: MDPI journal article supplement (doi:10.3390/ijms25031438), 2024-01-24
Supplement: s1 [file s1]

# Additional file

**Supplementary Table S1.** Human tissue information

| Sample | sex | age      | Possible bleeding causes     | ICH location                     | Estimated ICH volume | Performed experiment |
|--------|-----|----------|------------------------------|----------------------------------|----------------------|----------------------|
| ICH 1  | M   | 11       | Arteriovenous malformation   | Left parietal-occipital lobe     | 40mL                 | IHC                  |
| ICH 2  | F   | 11       | Cerebrovascular malformation | Left frontotemporal lobe         | 30mL                 | IHC                  |
| ICH 3  | F   | 10       | Arteriovenous malformation   | Midline area, left parietal lobe | 30mL                 | IHC                  |
| CTR1   | M   | New-born | -                            | -                                | -                    | IHC                  |
| CTR2   | M   | 59       | -                            | -                                | -                    | IHC                  |
| CTR3   | F   | 60       | -                            | -                                | -                    | IHC                  |

**Supplementary Table S2.** Primer sequences for RT-qPCR

| Genes         | Forward Primer (5'–3') | Reverse Primer (5'–3')   |
|---------------|------------------------|--------------------------|
| TonEBP        | AGCAGCCTCCAATCTCACAC   | GGGCGCTGTGTTTGAAAAAT     |
| TNF- $\alpha$ | CTCCAGGCGGTGCCTATGTC   | CCATTGCGAACTTCTCATCCCTTT |
| IL-1 $\beta$  | AGCTTCCTTGTGCAAGTGTC   | TTGGGGTCCGTCAACTTCAA     |
| IL-6          | GTTCTCTCTGCAAGAGACTTC  | AGTCTCCTCTCCGGAATTGT     |
| iNOS          | AATCTTGGAGCGAGTTGTGG   | CAGGAAGTAGGTGAGGGCTTG    |
| CD86          | CTCCCACCACAAATGGCACT   | CTTGGACCTTGGACTAGGCG     |
| PELI1         | GCAACAAGGACCAGCATAGC   | TACTGACTGCGTGTCGGAAT     |
| GAPDH         | GATGCAGGGATGATGTTCTG   | GTGAAGGTCGGTAACGG        |

**Supplementary Table S3.** Sh-RNA sequences and primer sequences for plasmids construction

| Oligonucleotides | Forward primer (5'–3')        | Feverse primer (5'–3')           |
|------------------|-------------------------------|----------------------------------|
| TonEBP           | GCTCTAGAATGCCCTCGGACTTCATCTCA | CCGCTCGAGAAAGGAGCCGGTTAAATTGTTCC |
| Scrambled sh-RNA | UUC UCC GAA CGU GUC ACG UTT   | ACG UGA CAC GUU CGG AGA ATT      |
| TonEBP sh-RNA    | CCAGUUCCUACAAUGAUAAACACU      | AGUGUUAUCAUUGUAGGAACUGG          |
